# Supplementary material
Source: bioRxiv or medRxiv preprint supplement (https://www.biorxiv.org/highwire/filestream/101088/field_highwire_adjunct_files/15/324509-8.pdf)
Supplement: Supplementary file [file 324509-8.pdf]

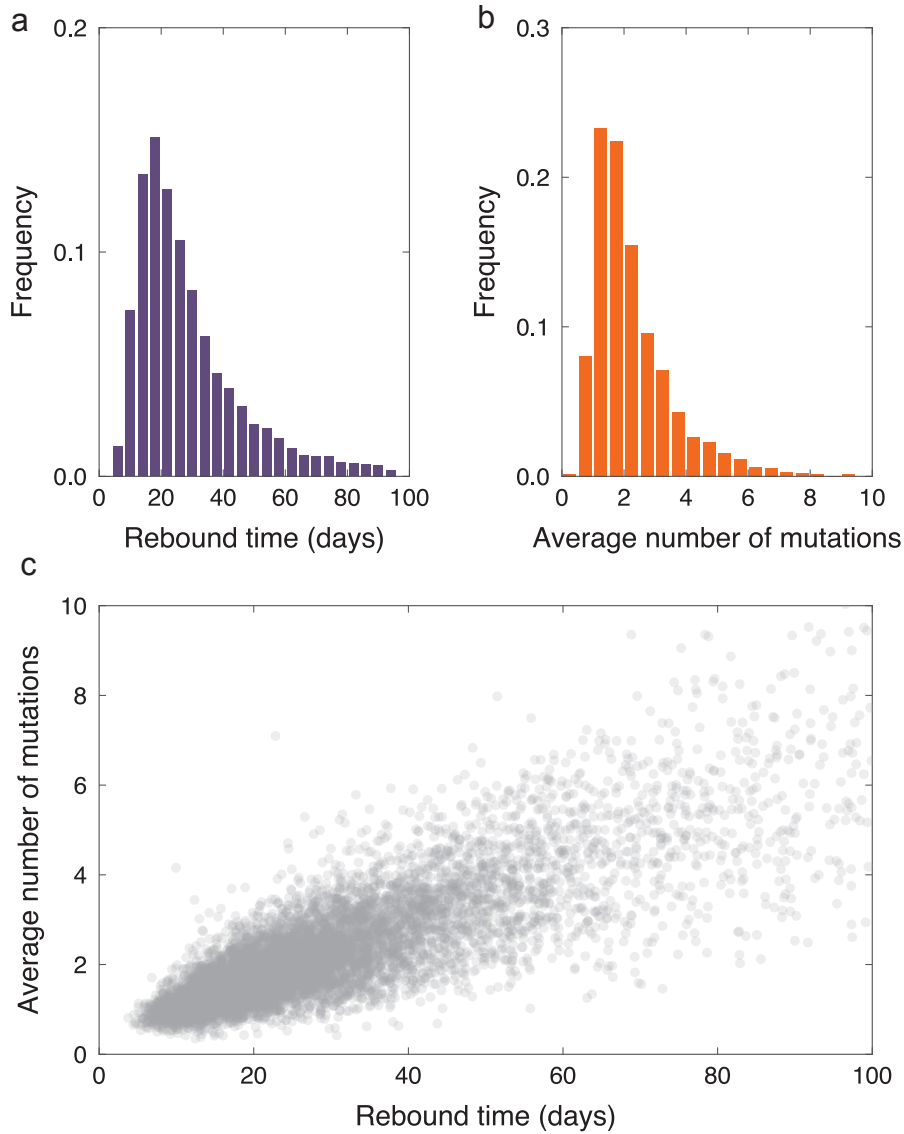

**Supplementary Figure 8. Typical time to rebound and accumulated mutations in simulations.** a, Histogram of the time to rebound across  $10^4$  simulations with randomly selected parameters. The typical time to rebound in simulation is around 3 weeks, which is congruent with typical results in ATI. b, Histogram of the mean number of mutations accumulated during rebound for each of the  $10^4$  simulations. c, Scatter plot of rebound time versus the mean number of accumulated mutations for all simulations. There is considerable variation, but longer rebound times are strongly associated with a larger number of accumulated mutations.
